# Supplementary material for: Single-Cell RNA-seq reveals transcriptomic modulation of Alzheimer’s disease by activated protein C
Source: Aging (Albany NY). 2024 Feb 21;16(4):3137–59. doi: 10.18632/aging.205624 (PMC10929801; doi:10.18632/aging.205624)
Supplement: Supplementary File 3 [file aging-16-205624-s004.xlsx]

## Sheet: Astrocyte
Supplementary File 3. Excel files containing significant differentially expressed genes (Log2FC > ± 1, adj. p-value < 0.05) between 5xFAD and wildtype (DEG-Dataset 1_5xFAD vs. WT.xlsx) and 5xFAD + APC and 5xFAD (DEG-Dataset 2_5xFAD APC vs. 5xFAD Vehicle.xlsx) organized by cell-type.
Gene	p_val	avg_log2FC	pct.1	pct.2	p_val_adj	Cell-Type
Gfap	2.26e-105	2.67552	0.462	0.173	5.04e-101	Astrocyte
Tyrobp	5.65e-199	2.25893	0.741	0.32	1.26e-194	Astrocyte
Tsix	0	2.22075	0.49	0.005	0	Astrocyte
Trem2	1.16e-180	2.14249	0.674	0.259	2.59e-176	Astrocyte
Ctsd	3.79e-278	2.11354	0.958	0.841	8.45e-274	Astrocyte
Ctss	1.63e-146	2.04382	0.674	0.317	3.65e-142	Astrocyte
Cst7	7.74e-230	2.02295	0.365	0.003	1.73e-225	Astrocyte
Rps29	1.95e-302	2.01224	0.957	0.849	4.35e-298	Astrocyte
Bc1	1.64e-128	1.90714	0.493	0.162	3.65e-124	Astrocyte
Lyz2	3.77e-115	1.8341	0.427	0.132	8.41e-111	Astrocyte
Rps28	1.2e-119	1.70477	0.699	0.511	2.69e-115	Astrocyte
C4b	5.27e-108	1.70317	0.425	0.134	1.18e-103	Astrocyte
C1qa	5.63e-159	1.6171	0.81	0.544	1.26e-154	Astrocyte
Cd52	2.29e-115	1.61496	0.387	0.098	5.11e-111	Astrocyte
B2m	2.02e-84	1.52713	0.537	0.307	4.51e-80	Astrocyte
Ctsb	1.98e-145	1.52087	0.832	0.751	4.42e-141	Astrocyte
Ctsz	1.42e-70	1.48948	0.635	0.515	3.17e-66	Astrocyte
Rpl38	4.31e-161	1.47047	0.823	0.713	9.61e-157	Astrocyte
C1qb	2.68e-104	1.4398	0.705	0.468	5.99e-100	Astrocyte
Rpl37	3.92e-118	1.31817	0.816	0.74	8.75e-114	Astrocyte
Rps21	2.44e-141	1.31756	0.851	0.809	5.44e-137	Astrocyte
Rpl18a	1.49e-112	1.31728	0.803	0.763	3.33e-108	Astrocyte
Laptm5	6.41e-59	1.31083	0.438	0.216	1.43e-54	Astrocyte
Mbp	1.16e-43	1.30893	0.467	0.313	2.59e-39	Astrocyte
Rpl37a	1.52e-108	1.2659	0.805	0.764	3.38e-104	Astrocyte
Cd68	3.61e-64	1.24826	0.304	0.103	8.06e-60	Astrocyte
Mpeg1	4.94e-60	1.23374	0.311	0.11	1.1e-55	Astrocyte
C1qc	3.72e-65	1.23064	0.543	0.32	8.31e-61	Astrocyte
Rps27	1.6e-104	1.21996	0.77	0.69	3.58e-100	Astrocyte
Ly6e	2.65e-53	1.19492	0.389	0.193	5.92e-49	Astrocyte
Rpl41	2.47e-128	1.16983	0.872	0.872	5.51e-124	Astrocyte
Fau	5.17e-105	1.16097	0.861	0.833	1.15e-100	Astrocyte
Rpl39	1.31e-54	1.14459	0.658	0.621	2.91e-50	Astrocyte
Cyba	3.59e-55	1.14175	0.46	0.262	8.02e-51	Astrocyte
Rps12	4.88e-79	1.13356	0.782	0.759	1.09e-74	Astrocyte
Syngr1	1.22e-31	1.08839	0.405	0.286	2.72e-27	Astrocyte
Timp2	2.22e-36	1.07234	0.446	0.32	4.96e-32	Astrocyte
Rpl6	1.08e-71	1.05131	0.757	0.753	2.4e-67	Astrocyte
Fcer1g	5.81e-41	1.04906	0.406	0.23	1.3e-36	Astrocyte
Ifitm3	7.59e-42	1.01754	0.27	0.112	1.69e-37	Astrocyte
Grn	3.37e-21	1.01102	0.402	0.319	7.53e-17	Astrocyte
Ccl3	3.96e-74	1.00209	0.201	0.029	8.85e-70	Astrocyte
Rpl35	3.79e-46	1.00192	0.541	0.429	8.46e-42	Astrocyte
Fermt2	6.44e-124	-1.02142	0.448	0.872	1.44e-119	Astrocyte
Btbd17	7.91e-133	-1.04557	0.383	0.835	1.76e-128	Astrocyte
Cspg5	3.03e-101	-1.05428	0.595	0.891	6.75e-97	Astrocyte
Nkain4	1.61e-115	-1.0594	0.257	0.711	3.59e-111	Astrocyte
Fjx1	2.47e-117	-1.12795	0.444	0.847	5.51e-113	Astrocyte
Cldn10	1.16e-158	-1.14171	0.472	0.894	2.59e-154	Astrocyte
Kcnk1	7.99e-127	-1.15893	0.297	0.745	1.78e-122	Astrocyte
Hes5	9.95e-83	-1.18288	0.275	0.64	2.22e-78	Astrocyte
Htra1	4.35e-185	-1.27098	0.635	0.952	9.72e-181	Astrocyte
Msmo1	8.32e-178	-1.43542	0.334	0.838	1.86e-173	Astrocyte

## Sheet: Endothelial
Gene	p_val	avg_log2FC	pct.1	pct.2	p_val_adj	Cell-Type
Ctsd	4.7e-278	2.55045	0.943	0.699	1.05e-273	Endothelial
Cst7	5.33e-126	2.38283	0.378	0.005	1.19e-121	Endothelial
Tyrobp	3.23e-165	2.27445	0.738	0.311	7.2e-161	Endothelial
Trem2	9.12e-139	2.22613	0.668	0.281	2.03e-134	Endothelial
Ctsb	1.43e-126	2.20166	0.71	0.489	3.19e-122	Endothelial
Apoe	0	2.15925	1	0.973	0	Endothelial
Bc1	5.65e-106	2.04771	0.503	0.163	1.26e-101	Endothelial
Ctss	7.54e-122	1.94214	0.671	0.301	1.68e-117	Endothelial
Ctsz	8.58e-88	1.84234	0.643	0.457	1.91e-83	Endothelial
Cd52	5.81e-72	1.66596	0.392	0.123	1.3e-67	Endothelial
Syngr1	3.57e-63	1.66158	0.375	0.134	7.96e-59	Endothelial
Lyz2	1.31e-83	1.63188	0.457	0.161	2.93e-79	Endothelial
Mbp	1.27e-45	1.62566	0.465	0.291	2.83e-41	Endothelial
C1qa	2.15e-133	1.54046	0.796	0.513	4.8e-129	Endothelial
Cd68	5.06e-55	1.48989	0.351	0.127	1.13e-50	Endothelial
C1qb	1.24e-108	1.48703	0.733	0.463	2.76e-104	Endothelial
Tsix	6.94e-90	1.43838	0.281	0.001	1.55e-85	Endothelial
Timp2	1.12e-46	1.43023	0.386	0.194	2.51e-42	Endothelial
Laptm5	2.08e-58	1.39611	0.492	0.246	4.64e-54	Endothelial
C1qc	1.37e-61	1.32525	0.555	0.309	3.05e-57	Endothelial
Mpeg1	1.62e-40	1.31515	0.321	0.133	3.61e-36	Endothelial
Rps29	8.71e-278	1.29308	0.989	0.965	1.95e-273	Endothelial
Rps28	5.96e-108	1.28025	0.799	0.775	1.33e-103	Endothelial
Cd63	7e-35	1.27636	0.412	0.266	1.56e-30	Endothelial
Ctsa	1.82e-33	1.21428	0.417	0.285	4.05e-29	Endothelial
Ccl4	4.12e-47	1.20644	0.183	0.014	9.19e-43	Endothelial
Grn	3.77e-25	1.18546	0.446	0.363	8.41e-21	Endothelial
Lpl	7.72e-54	1.17024	0.198	0.012	1.72e-49	Endothelial
Hexa	8.26e-26	1.16677	0.391	0.285	1.84e-21	Endothelial
Ccl3	3.43e-44	1.13481	0.216	0.038	7.65e-40	Endothelial
Plek	1.14e-32	1.12154	0.264	0.109	2.53e-28	Endothelial
Plxdc2	4.97e-31	1.11539	0.33	0.17	1.11e-26	Endothelial
Npc2	3.13e-24	1.06843	0.554	0.577	6.99e-20	Endothelial
Trf	1.51e-27	1.05455	0.453	0.354	3.36e-23	Endothelial
Ifi27l2a	1.52e-29	1.04853	0.266	0.114	3.4e-25	Endothelial
Fcer1g	1.53e-32	1.03119	0.42	0.247	3.41e-28	Endothelial
Ddx3y	3.77e-190	-1.03349	0	0.373	8.41e-186	Endothelial

## Sheet: Micoglia
Gene	p_val	avg_log2FC	pct.1	pct.2	p_val_adj	Cell-Type
Apoe	0	4.63122	1	0.898	0	Microglial
Cst7	0	3.78374	0.706	0.031	0	Microglial
Lyz2	0	2.251	0.861	0.503	0	Microglial
Lpl	0	2.20111	0.494	0.06	0	Microglial
Ifi27l2a	0	1.98895	0.489	0.068	0	Microglial
Tsix	0	1.94465	0.423	0.002	0	Microglial
Csf1	0	1.91761	0.396	0.049	0	Microglial
Lgals3bp	0	1.85937	0.63	0.228	0	Microglial
Bc1	0	1.8483	0.458	0.075	0	Microglial
Fabp5	0	1.81979	0.426	0.11	0	Microglial
Ank	0	1.80726	0.458	0.083	0	Microglial
Gpnmb	1.29e-211	1.79735	0.184	0.001	2.89e-207	Microglial
Igf1	0	1.79212	0.366	0.012	0	Microglial
Ccl4	0	1.7213	0.435	0.092	0	Microglial
Rps28	0	1.70836	0.946	0.835	0	Microglial
Rpl38	0	1.59152	0.954	0.852	0	Microglial
Cd52	0	1.57507	0.805	0.56	0	Microglial
Cd74	6.74e-261	1.55719	0.362	0.109	1.5e-256	Microglial
Ctsb	0	1.52662	0.982	0.945	0	Microglial
Rps29	0	1.52122	0.995	0.954	0	Microglial
Hif1a	0	1.51877	0.604	0.326	0	Microglial
Gm10076	0	1.51061	0.709	0.423	0	Microglial
Itgax	0	1.43321	0.294	0.01	0	Microglial
Cox6a2	0	1.43315	0.32	0.025	0	Microglial
Ccl3	0	1.40464	0.529	0.167	0	Microglial
Cd63	0	1.39816	0.839	0.644	0	Microglial
Adamts1	2.16e-179	1.39257	0.248	0.054	4.82e-175	Microglial
Spp1	1.07e-125	1.37969	0.127	0.007	2.38e-121	Microglial
Aplp2	0	1.36351	0.596	0.359	0	Microglial
Lilrb4a	7.44e-285	1.32166	0.259	0.013	1.66e-280	Microglial
Gm1673	0	1.30968	0.313	0.035	0	Microglial
Crlf2	0	1.29089	0.469	0.183	0	Microglial
Axl	0	1.27496	0.314	0.026	0	Microglial
Rpl41	0	1.2453	0.968	0.928	0	Microglial
Gnas	0	1.24192	0.81	0.701	0	Microglial
Pld3	2.49e-288	1.23266	0.51	0.273	5.56e-284	Microglial
Rps21	0	1.21107	0.976	0.937	0	Microglial
Cacna1a	1.24e-283	1.20783	0.318	0.055	2.76e-279	Microglial
Myo1e	1.78e-269	1.18104	0.347	0.089	3.97e-265	Microglial
Mbp	2.46e-177	1.15742	0.503	0.335	5.5e-173	Microglial
Ifitm3	9.8e-196	1.14869	0.314	0.102	2.19e-191	Microglial
Ccl6	1.55e-123	1.13808	0.462	0.342	3.45e-119	Microglial
Baiap2l2	7.47e-285	1.13458	0.239	0.001	1.67e-280	Microglial
Rpl37a	0	1.12543	0.968	0.924	0	Microglial
Nceh1	1.31e-260	1.12507	0.331	0.078	2.92e-256	Microglial
Syngr1	0	1.12431	0.787	0.734	0	Microglial
B2m	0	1.11527	0.93	0.859	0	Microglial
Ctsd	0	1.09439	0.999	0.989	0	Microglial
Crip1	3.94e-235	1.09189	0.302	0.069	8.78e-231	Microglial
Rpl37	0	1.0889	0.965	0.918	0	Microglial
Rpl36	0	1.08277	0.913	0.854	0	Microglial
Mif	5.4e-211	1.08122	0.506	0.33	1.21e-206	Microglial
Rpl6	0	1.07857	0.951	0.903	0	Microglial
Ramp1	2.79e-218	1.07807	0.447	0.232	6.23e-214	Microglial
Ctsz	0	1.07705	0.975	0.944	0	Microglial
Rps27	0	1.0707	0.943	0.892	0	Microglial
Rpl18a	0	1.06828	0.976	0.937	0	Microglial
Atf3	2.49e-158	1.06024	0.353	0.157	5.55e-154	Microglial
Npc2	0	1.03105	0.896	0.847	0	Microglial
Rpl35	0	1.02965	0.803	0.718	0	Microglial
Serpine1	2.23e-86	1.02786	0.13	0.028	4.97e-82	Microglial
Wfdc17	4.64e-178	1.01265	0.184	0.015	1.03e-173	Microglial
Ltc4s	0	-1.03669	0.429	0.805	0	Microglial
Cmtm7	0	-1.04979	0.268	0.708	0	Microglial
P2ry13	0	-1.05263	0.466	0.846	0	Microglial
Sox4	0	-1.05444	0.194	0.557	0	Microglial
Pnp	0	-1.07969	0.164	0.591	0	Microglial
Ckb	0	-1.10959	0.524	0.886	0	Microglial
Txnip	0	-1.19649	0.278	0.741	0	Microglial
Tmem119	0	-1.20812	0.592	0.929	0	Microglial
Jund	0	-1.2105	0.52	0.799	0	Microglial
Ccr5	0	-1.2265	0.263	0.742	0	Microglial
Crybb1	0	-1.23417	0.152	0.59	0	Microglial
Lgmn	0	-1.23712	0.703	0.945	0	Microglial
Selplg	0	-1.24304	0.721	0.951	0	Microglial
Ifngr1	0	-1.25691	0.401	0.853	0	Microglial
Lpcat2	0	-1.28072	0.398	0.868	0	Microglial
P2ry12	0	-1.34694	0.737	0.949	0	Microglial
Ecscr	0	-1.54278	0.138	0.7	0	Microglial

## Sheet: Neuron
Gene	p_val	avg_log2FC	pct.1	pct.2	p_val_adj	Cell-Type
Cst7	4.98e-142	2.88017	0.428	0.005	1.11e-137	Neuron
Tsix	2.61e-127	2.51742	0.38	0	5.83e-123	Neuron
Ctsd	5.2e-197	2.45686	0.946	0.564	1.16e-192	Neuron
Ctsb	4.54e-117	2.31809	0.739	0.407	1.01e-112	Neuron
Rps29	1.12e-212	2.28515	0.929	0.593	2.49e-208	Neuron
Tyrobp	7.1e-139	2.27593	0.789	0.346	1.59e-134	Neuron
Lyz2	4.37e-100	2.25445	0.52	0.145	9.75e-96	Neuron
Rps28	5.62e-125	2.19833	0.704	0.332	1.25e-120	Neuron
Ctsz	3.71e-95	2.16532	0.657	0.331	8.27e-91	Neuron
Trem2	6.01e-110	2.14884	0.702	0.307	1.34e-105	Neuron
Bc1	1.41e-83	2.07104	0.465	0.117	3.15e-79	Neuron
Cd52	5.35e-79	1.98151	0.447	0.126	1.19e-74	Neuron
Apoe	1.45e-201	1.97076	1	0.971	3.23e-197	Neuron
Ctss	1.44e-101	1.92742	0.726	0.337	3.22e-97	Neuron
B2m	7.13e-96	1.90836	0.621	0.274	1.59e-91	Neuron
Rpl38	1.31e-126	1.8861	0.756	0.425	2.92e-122	Neuron
Rpl18a	2.11e-131	1.84706	0.804	0.472	4.71e-127	Neuron
Rps21	2.95e-134	1.75905	0.814	0.497	6.58e-130	Neuron
Syngr1	5.18e-51	1.7513	0.425	0.179	1.16e-46	Neuron
Rpl37a	2.36e-111	1.68633	0.772	0.486	5.26e-107	Neuron
Rpl6	4.85e-109	1.68223	0.747	0.471	1.08e-104	Neuron
Rpl37	2.47e-121	1.65309	0.793	0.457	5.52e-117	Neuron
Ifi27l2a	2.61e-61	1.63146	0.271	0.033	5.83e-57	Neuron
Cd68	6.49e-50	1.60489	0.395	0.151	1.45e-45	Neuron
Rpl39	1.04e-80	1.59834	0.669	0.382	2.32e-76	Neuron
Fau	1.99e-106	1.58612	0.822	0.549	4.44e-102	Neuron
Ccl4	1.96e-51	1.57153	0.227	0.026	4.37e-47	Neuron
Lpl	1.41e-67	1.56619	0.239	0.01	3.14e-63	Neuron
Timp2	7.34e-48	1.56492	0.445	0.207	1.64e-43	Neuron
Mpeg1	1.03e-49	1.54871	0.425	0.172	2.31e-45	Neuron
Lgals3bp	1.53e-51	1.54856	0.319	0.088	3.42e-47	Neuron
Mbp	4.04e-29	1.54047	0.467	0.279	9.01e-25	Neuron
Rps27	4.7e-84	1.52983	0.698	0.452	1.05e-79	Neuron
Npc2	9e-50	1.52709	0.539	0.321	2.01e-45	Neuron
Rpl41	4.23e-111	1.5144	0.815	0.569	9.45e-107	Neuron
Rps12	2.28e-95	1.50382	0.791	0.542	5.08e-91	Neuron
Grn	1.22e-44	1.48292	0.473	0.24	2.71e-40	Neuron
Rplp2	2.69e-81	1.48107	0.702	0.434	6.01e-77	Neuron
Gm10076	3.11e-49	1.42205	0.437	0.192	6.94e-45	Neuron
Ctsl	1.72e-40	1.41541	0.514	0.307	3.84e-36	Neuron
Fth1	6.94e-120	1.40969	0.927	0.829	1.55e-115	Neuron
Gfap	2.65e-28	1.39972	0.224	0.067	5.91e-24	Neuron
Rpl36	8.83e-68	1.39758	0.665	0.43	1.97e-63	Neuron
Rpl35	8.81e-50	1.39058	0.506	0.266	1.97e-45	Neuron
C1qa	6.33e-96	1.38813	0.831	0.518	1.41e-91	Neuron
H2-D1	1.49e-52	1.38593	0.455	0.192	3.32e-48	Neuron
Ccl3	1.63e-49	1.38351	0.241	0.035	3.64e-45	Neuron
C1qb	1.53e-77	1.36997	0.761	0.45	3.42e-73	Neuron
Laptm5	1.47e-55	1.35809	0.555	0.258	3.28e-51	Neuron
Cyba	5.44e-43	1.35544	0.497	0.266	1.21e-38	Neuron
Hexa	6.85e-35	1.33826	0.44	0.244	1.53e-30	Neuron
Rps15	2.65e-75	1.32383	0.723	0.49	5.91e-71	Neuron
Eef1a1	2.94e-68	1.31899	0.734	0.546	6.57e-64	Neuron
Ctsa	6.69e-33	1.31821	0.445	0.258	1.49e-28	Neuron
Ftl1	4.13e-65	1.30163	0.702	0.468	9.22e-61	Neuron
Rpl12	1.72e-53	1.27761	0.633	0.409	3.83e-49	Neuron
Rpsa	3.3e-52	1.26438	0.639	0.431	7.36e-48	Neuron
Rpl10a	1.76e-45	1.24752	0.584	0.384	3.93e-41	Neuron
Rpl23	2.56e-65	1.24284	0.727	0.504	5.72e-61	Neuron
Plek	3.6e-33	1.23134	0.314	0.127	8.04e-29	Neuron
Ly6e	8.86e-48	1.21364	0.54	0.28	1.98e-43	Neuron
Ccl6	2.92e-24	1.20839	0.211	0.072	6.51e-20	Neuron
Rack1	3.53e-41	1.2076	0.546	0.345	7.89e-37	Neuron
Rps9	5.42e-58	1.20755	0.691	0.484	1.21e-53	Neuron
Rps5	1.61e-51	1.20014	0.631	0.402	3.59e-47	Neuron
C4b	9.54e-27	1.18985	0.189	0.049	2.13e-22	Neuron
Rps14	1.48e-67	1.18817	0.744	0.532	3.31e-63	Neuron
Rpl23a	5.93e-50	1.17609	0.623	0.407	1.32e-45	Neuron
Rpl19	6.65e-49	1.15494	0.657	0.455	1.48e-44	Neuron
C1qc	2.34e-51	1.15278	0.622	0.337	5.21e-47	Neuron
Rpl32	2.63e-47	1.15008	0.633	0.438	5.86e-43	Neuron
Rplp1	3.4e-74	1.14573	0.82	0.627	7.59e-70	Neuron
Rpl13a	1.64e-61	1.1408	0.707	0.487	3.67e-57	Neuron
Cd74	2.64e-33	1.12926	0.219	0.053	5.89e-29	Neuron
Trf	3.08e-30	1.12002	0.522	0.349	6.87e-26	Neuron
Rpl34	1.86e-50	1.11904	0.653	0.426	4.15e-46	Neuron
Igf1	8.34e-51	1.11086	0.182	0.007	1.86e-46	Neuron
Rpl5	1.84e-36	1.09099	0.557	0.364	4.1e-32	Neuron
Abhd12	2.52e-27	1.08982	0.406	0.23	5.61e-23	Neuron
H2-K1	4.47e-30	1.08581	0.429	0.24	9.98e-26	Neuron
Rps17	4.59e-40	1.07887	0.577	0.37	1.02e-35	Neuron
Rpl21	5.29e-45	1.07099	0.684	0.525	1.18e-40	Neuron
Rpl31	2.35e-37	1.06971	0.545	0.346	5.24e-33	Neuron
Rps26	1.69e-37	1.0627	0.565	0.357	3.76e-33	Neuron
Csf1	3.69e-23	1.06207	0.211	0.073	8.25e-19	Neuron
Rps4x	4.54e-42	1.05756	0.632	0.432	1.01e-37	Neuron
Rpl36a	3.35e-30	1.05349	0.496	0.321	7.47e-26	Neuron
Rplp0	1.61e-30	1.03933	0.536	0.371	3.6e-26	Neuron
Fcer1g	1.21e-39	1.03803	0.528	0.276	2.71e-35	Neuron
Rps16	1.61e-46	1.03124	0.66	0.445	3.6e-42	Neuron
Rpl8	6.4e-49	1.02255	0.665	0.466	1.43e-44	Neuron
Crlf2	8.65e-32	1.01126	0.223	0.063	1.93e-27	Neuron
Rpl26	1.32e-46	1.00771	0.681	0.468	2.94e-42	Neuron
Irf8	2.4e-26	1.00547	0.342	0.165	5.37e-22	Neuron
Cd63	1.42e-29	1.00138	0.539	0.395	3.16e-25	Neuron
Vegfa	1.63e-47	-1.00211	0.126	0.422	3.63e-43	Neuron
Plpp3	1.1e-59	-1.01806	0.372	0.728	2.45e-55	Neuron
Ddx3y	2.33e-55	-1.0204	0	0.226	5.19e-51	Neuron
Fgfr3	5.23e-56	-1.02747	0.216	0.573	1.17e-51	Neuron
Ckb	1.96e-57	-1.03071	0.546	0.845	4.38e-53	Neuron
Gm3764	3.07e-56	-1.0645	0.515	0.76	6.86e-52	Neuron
Slc7a10	5.11e-56	-1.08141	0.164	0.511	1.14e-51	Neuron
Eif2s3y	7.83e-52	-1.08341	0	0.213	1.75e-47	Neuron
Htra1	3.03e-58	-1.16111	0.132	0.464	6.76e-54	Neuron
Dclk1	7.95e-54	-1.23069	0.315	0.644	1.77e-49	Neuron
Cspg5	1.41e-55	-1.35209	0.229	0.561	3.14e-51	Neuron

## Sheet: Oligodendrocyte
Gene	p_val	avg_log2FC	pct.1	pct.2	p_val_adj	Cell-Type
Tyrobp	0	2.45321	0.769	0.345	0	Oligodendrocyte
Ctsd	0	2.44836	0.97	0.808	0	Oligodendrocyte
Trem2	0	2.36041	0.706	0.308	0	Oligodendrocyte
Ctss	0	2.27022	0.697	0.345	0	Oligodendrocyte
C4b	2.41e-207	2.25528	0.365	0.107	5.38e-203	Oligodendrocyte
Cst7	0	2.23656	0.395	0.004	0	Oligodendrocyte
Apoe	0	1.97721	0.999	0.973	0	Oligodendrocyte
Ctsz	3.69e-255	1.84492	0.683	0.546	8.24e-251	Oligodendrocyte
Bc1	3.21e-305	1.81917	0.597	0.287	7.17e-301	Oligodendrocyte
C1qa	0	1.76916	0.818	0.581	0	Oligodendrocyte
Lyz2	1.13e-284	1.7318	0.477	0.154	2.52e-280	Oligodendrocyte
Ctsb	0	1.7314	0.804	0.75	0	Oligodendrocyte
B2m	5.65e-251	1.71712	0.583	0.33	1.26e-246	Oligodendrocyte
Cd52	4.11e-259	1.69335	0.419	0.115	9.17e-255	Oligodendrocyte
C1qb	0	1.6781	0.754	0.527	0	Oligodendrocyte
Rps29	0	1.61512	0.983	0.915	0	Oligodendrocyte
Tsix	0	1.59886	0.344	0.008	0	Oligodendrocyte
Laptm5	1.04e-189	1.52509	0.509	0.255	2.33e-185	Oligodendrocyte
Cd68	2.84e-171	1.45337	0.362	0.131	6.33e-167	Oligodendrocyte
Syngr1	2.9e-133	1.44504	0.405	0.225	6.48e-129	Oligodendrocyte
C1qc	4.09e-193	1.41927	0.582	0.343	9.12e-189	Oligodendrocyte
Mpeg1	7.85e-141	1.36152	0.352	0.143	1.75e-136	Oligodendrocyte
Rps28	0	1.33238	0.857	0.806	0	Oligodendrocyte
Grn	1.51e-123	1.32245	0.478	0.325	3.37e-119	Oligodendrocyte
Cyba	3.12e-137	1.25398	0.445	0.244	6.96e-133	Oligodendrocyte
Fcer1g	1.55e-136	1.24058	0.467	0.259	3.45e-132	Oligodendrocyte
Hexb	4.22e-152	1.17547	0.619	0.48	9.41e-148	Oligodendrocyte
Ccl3	9.2e-155	1.1445	0.232	0.037	2.05e-150	Oligodendrocyte
Csf1r	2.25e-120	1.14146	0.511	0.334	5.02e-116	Oligodendrocyte
Lgals3bp	2.96e-117	1.12567	0.341	0.163	6.61e-113	Oligodendrocyte
Ly6e	4.78e-124	1.12256	0.48	0.299	1.07e-119	Oligodendrocyte
Ccl4	8.06e-139	1.12128	0.194	0.023	1.8e-134	Oligodendrocyte
Hexa	3.59e-61	1.09269	0.449	0.391	8.01e-57	Oligodendrocyte
Rpl38	0	1.08816	0.923	0.876	0	Oligodendrocyte
Lpl	5.62e-166	1.06887	0.207	0.015	1.25e-161	Oligodendrocyte
Plek	4.36e-113	1.06751	0.276	0.101	9.73e-109	Oligodendrocyte
Cx3cr1	2.14e-101	1.04252	0.51	0.359	4.77e-97	Oligodendrocyte
Cst3	0	1.02432	0.992	0.98	0	Oligodendrocyte
Gpm6b	1.96e-182	-1.01736	0.523	0.727	4.38e-178	Oligodendrocyte
Fam155a	2.06e-258	-1.03978	0.002	0.221	4.59e-254	Oligodendrocyte
Cryab	3.46e-207	-1.07436	0.674	0.86	7.72e-203	Oligodendrocyte
Mal	5.76e-148	-1.15028	0.517	0.715	1.29e-143	Oligodendrocyte

## Sheet: OPC
Gene	p_val	avg_log2FC	pct.1	pct.2	p_val_adj	Cell-Type
Ctsd	4.8e-279	2.98321	0.962	0.664	1.07e-274	OPC
Cst7	4.06e-167	2.71478	0.457	0.009	9.07e-163	OPC
Tyrobp	6.18e-180	2.51719	0.793	0.356	1.38e-175	OPC
Trem2	1.1e-171	2.38099	0.744	0.287	2.46e-167	OPC
Ctsz	1.04e-117	2.28867	0.683	0.41	2.32e-113	OPC
Tsix	3.51e-191	2.25981	0.494	0	7.83e-187	OPC
Ctss	8.32e-139	2.20836	0.745	0.373	1.86e-134	OPC
Ctsb	4.17e-140	2.18068	0.789	0.568	9.31e-136	OPC
Cd52	4.28e-108	2.01181	0.492	0.13	9.55e-104	OPC
Lyz2	1.6e-98	1.7838	0.51	0.176	3.57e-94	OPC
Bc1	1.42e-100	1.77139	0.528	0.181	3.16e-96	OPC
B2m	1.77e-91	1.76701	0.633	0.379	3.95e-87	OPC
Grn	6.82e-69	1.75586	0.505	0.256	1.52e-64	OPC
C1qa	2.65e-128	1.68816	0.832	0.574	5.91e-124	OPC
Cd68	4.92e-75	1.68491	0.41	0.13	1.1e-70	OPC
C1qb	5.78e-121	1.68366	0.794	0.492	1.29e-116	OPC
Laptm5	8.46e-82	1.67216	0.568	0.267	1.89e-77	OPC
Mpeg1	2.39e-69	1.59711	0.419	0.149	5.33e-65	OPC
Rps29	5.03e-209	1.5697	0.971	0.861	1.12e-204	OPC
Syngr1	7.22e-50	1.39784	0.537	0.37	1.61e-45	OPC
Ly6e	2.59e-58	1.38519	0.53	0.293	5.78e-54	OPC
Lpl	6.53e-71	1.37988	0.25	0.02	1.46e-66	OPC
Hexa	2.75e-40	1.36644	0.475	0.326	6.13e-36	OPC
Fcer1g	2.8e-58	1.34233	0.521	0.267	6.24e-54	OPC
C1qc	1.39e-64	1.33509	0.622	0.37	3.09e-60	OPC
Ccl6	8.23e-48	1.32389	0.249	0.059	1.84e-43	OPC
Ccl3	3.66e-56	1.28161	0.254	0.044	8.18e-52	OPC
Ctsa	8.44e-40	1.27096	0.452	0.293	1.88e-35	OPC
Ccl4	2.8e-61	1.26738	0.239	0.025	6.26e-57	OPC
Lgals3bp	4.77e-51	1.24078	0.354	0.142	1.06e-46	OPC
Csf1r	1.27e-49	1.21374	0.552	0.33	2.84e-45	OPC
Rps28	5.09e-82	1.20421	0.799	0.672	1.14e-77	OPC
Plek	3.02e-53	1.20248	0.335	0.113	6.75e-49	OPC
Timp2	6.35e-40	1.19286	0.488	0.333	1.42e-35	OPC
Hexb	9.46e-54	1.17398	0.632	0.443	2.11e-49	OPC
Cyba	9.49e-41	1.16555	0.515	0.354	2.12e-36	OPC
Ifi27l2a	1.66e-27	1.14735	0.441	0.285	3.7e-23	OPC
Npc2	1.9e-50	1.11426	0.678	0.595	4.24e-46	OPC
Itgb5	1.01e-39	1.10512	0.386	0.188	2.26e-35	OPC
Ctsl	2.7e-26	1.06842	0.54	0.463	6.03e-22	OPC
Irf8	1.12e-44	1.06404	0.361	0.146	2.5e-40	OPC
Gpnmb	3.39e-34	1.05704	0.115	0.004	7.56e-30	OPC
Gpr183	4.14e-35	1.02778	0.259	0.092	9.24e-31	OPC
Aif1	7.79e-44	1.02027	0.402	0.181	1.74e-39	OPC
Cx3cr1	6.76e-38	1.01789	0.542	0.364	1.51e-33	OPC
Gusb	7.28e-24	1.00698	0.299	0.17	1.63e-19	OPC
Fcrls	1.27e-30	1.00079	0.364	0.187	2.83e-26	OPC
Celf4	3.86e-45	-1.04967	0.101	0.319	8.61e-41	OPC
H3f3a	4.53e-48	-1.0666	0.554	0.757	1.01e-43	OPC
Tubb3	2.51e-33	-1.07344	0.087	0.257	5.6e-29	OPC
Nrxn1	2.85e-58	-1.11743	0.163	0.459	6.37e-54	OPC
Tmsb10	9.46e-38	-1.13183	0.511	0.671	2.11e-33	OPC
Pfn2	3.82e-51	-1.14444	0.138	0.394	8.52e-47	OPC
Igfbpl1	1.02e-43	-1.16732	0.049	0.226	2.28e-39	OPC
Tuba1a	3.71e-48	-1.17021	0.493	0.735	8.28e-44	OPC
Meis2	9.54e-38	-1.17696	0.134	0.339	2.13e-33	OPC
Meg3	2.27e-35	-1.23011	0.181	0.39	5.07e-31	OPC
Stmn2	5.09e-38	-1.25297	0.088	0.274	1.14e-33	OPC
Sox4	1.3e-29	-1.3246	0.21	0.396	2.91e-25	OPC
Sox11	8.57e-40	-1.33672	0.103	0.3	1.91e-35	OPC
Syne1	1.08e-19	-1.34474	0.209	0.364	2.4e-15	OPC
Tubb2b	1.8e-43	-1.7129	0.135	0.349	4.01e-39	OPC
