# Supplementary material for: Single-Cell RNA-seq reveals transcriptomic modulation of Alzheimer’s disease by activated protein C
Source: Aging (Albany NY). 2024 Feb 21;16(4):3137–59. doi: 10.18632/aging.205624 (PMC10929801; doi:10.18632/aging.205624)
Supplement: Supplementary File 4 [file aging-16-205624-s005.xlsx]

## Sheet: Astrocyte
Supplementary File 4. Excel files containing significant differentially expressed genes (Log2FC > ± 1, adj. p-value < 0.05) between 5xFAD and wildtype (DEG-Dataset 1_5xFAD vs. WT.xlsx) and 5xFAD + APC and 5xFAD (DEG-Dataset 2_5xFAD APC vs. 5xFAD Vehicle.xlsx) organized by cell-type.
Gene	p_val	avg_log2FC	pct.1	pct.2	p_val_adj	Cell-Type
Hbb-bs	5.25e-24	1.27446	0.26	0.111	1.17e-19	Astrocyte
Htra1	2.61e-106	1.03078	0.861	0.635	5.82e-102	Astrocyte
Timp2	5.22e-54	-1.00356	0.22	0.446	1.17e-49	Astrocyte
Fcer1g	8.64e-52	-1.01687	0.18	0.406	1.93e-47	Astrocyte
Slc38a1	4.28e-41	-1.02185	0.142	0.332	9.55e-37	Astrocyte
Rpl12	1.1e-63	-1.03456	0.387	0.621	2.45e-59	Astrocyte
Laptm5	1.54e-53	-1.08822	0.201	0.438	3.44e-49	Astrocyte
Rpl18a	6.52e-89	-1.0924	0.627	0.803	1.46e-84	Astrocyte
Rps12	1.92e-84	-1.11193	0.582	0.782	4.29e-80	Astrocyte
Mpeg1	1.24e-59	-1.11483	0.101	0.311	2.76e-55	Astrocyte
Syngr1	8.9e-65	-1.12545	0.164	0.405	1.99e-60	Astrocyte
Cyba	1.22e-76	-1.12771	0.181	0.46	2.72e-72	Astrocyte
Rpl37	1.86e-99	-1.13657	0.604	0.816	4.14e-95	Astrocyte
Rpl37a	7.12e-99	-1.15366	0.599	0.805	1.59e-94	Astrocyte
C1qc	8.59e-70	-1.15691	0.257	0.543	1.92e-65	Astrocyte
Rps27	2.97e-105	-1.16331	0.52	0.77	6.62e-101	Astrocyte
Rps21	2.9e-117	-1.16954	0.675	0.851	6.47e-113	Astrocyte
Tmsb4x	1.53e-122	-1.18978	0.646	0.88	3.41e-118	Astrocyte
Rpl41	2.31e-129	-1.19095	0.705	0.872	5.15e-125	Astrocyte
Cd68	1.32e-81	-1.20949	0.07	0.304	2.94e-77	Astrocyte
Rpl38	7.7e-127	-1.21662	0.591	0.823	1.72e-122	Astrocyte
Rpl39	5.65e-83	-1.23673	0.413	0.658	1.26e-78	Astrocyte
Fau	2.82e-119	-1.26104	0.652	0.861	6.29e-115	Astrocyte
Ctsb	4.11e-117	-1.3197	0.602	0.832	9.18e-113	Astrocyte
C1qb	6.68e-103	-1.35338	0.361	0.705	1.49e-98	Astrocyte
Ctsz	4.36e-90	-1.40611	0.341	0.635	9.73e-86	Astrocyte
B2m	1.14e-102	-1.42539	0.216	0.537	2.53e-98	Astrocyte
C4b	3.28e-94	-1.46107	0.134	0.425	7.33e-90	Astrocyte
Rps28	3.8e-113	-1.48206	0.401	0.699	8.48e-109	Astrocyte
C1qa	8.51e-146	-1.51449	0.418	0.81	1.9e-141	Astrocyte
Cd52	2.68e-115	-1.52165	0.085	0.387	5.98e-111	Astrocyte
Rps29	5.68e-222	-1.59611	0.799	0.957	1.27e-217	Astrocyte
Ctss	6.3e-120	-1.65887	0.295	0.674	1.41e-115	Astrocyte
Lyz2	1.28e-131	-1.71387	0.093	0.427	2.85e-127	Astrocyte
Cst7	2.48e-220	-2.02391	0.002	0.365	5.53e-216	Astrocyte
Ctsd	8.95e-250	-2.02998	0.677	0.958	2e-245	Astrocyte
Trem2	3.64e-192	-2.1433	0.204	0.674	8.13e-188	Astrocyte
Tyrobp	1.14e-217	-2.23552	0.225	0.741	2.55e-213	Astrocyte
Gfap	9.65e-122	-2.5196	0.127	0.462	2.15e-117	Astrocyte

## Sheet: Endothelial
Gene	p_val	avg_log2FC	pct.1	pct.2	p_val_adj	Cell-Type
Cst7	5.96e-234	-2.37869	0.004	0.378	1.33e-229	Endothelial
Ctsd	0	-2.19094	0.594	0.943	0	Endothelial
Tyrobp	2.5e-243	-2.17669	0.277	0.738	5.59e-239	Endothelial
Trem2	3.22e-217	-2.11749	0.234	0.668	7.2e-213	Endothelial
Apoe	0	-1.81797	0.964	1	0	Endothelial
Ctsb	8.67e-152	-1.73798	0.421	0.71	1.93e-147	Endothelial
Ctsz	1.08e-141	-1.63994	0.339	0.643	2.42e-137	Endothelial
Syngr1	2.86e-120	-1.60498	0.099	0.375	6.39e-116	Endothelial
Lyz2	5.01e-151	-1.50055	0.121	0.457	1.12e-146	Endothelial
Cd52	2.42e-117	-1.46005	0.107	0.392	5.4e-113	Endothelial
Ctss	5.22e-135	-1.40117	0.321	0.671	1.17e-130	Endothelial
C1qa	2.32e-171	-1.36267	0.431	0.796	5.19e-167	Endothelial
Cd68	5.9e-97	-1.34868	0.104	0.351	1.32e-92	Endothelial
C1qb	2.49e-140	-1.23681	0.378	0.733	5.56e-136	Endothelial
Timp2	3.38e-73	-1.22086	0.17	0.386	7.55e-69	Endothelial
Cd63	1.2e-68	-1.17111	0.201	0.412	2.69e-64	Endothelial
Lpl	2.74e-104	-1.15344	0.007	0.198	6.11e-100	Endothelial
C1qc	5.74e-88	-1.1445	0.277	0.555	1.28e-83	Endothelial
Ifi27l2a	4.06e-82	-1.12924	0.059	0.266	9.06e-78	Endothelial
Mpeg1	5.28e-55	-1.09837	0.139	0.321	1.18e-50	Endothelial
Rps28	6.54e-127	-1.08666	0.656	0.799	1.46e-122	Endothelial
Hexa	1.22e-58	-1.06258	0.198	0.391	2.73e-54	Endothelial
Grn	2.91e-58	-1.06093	0.249	0.446	6.49e-54	Endothelial
Rps29	1.66e-295	-1.05808	0.935	0.989	3.7e-291	Endothelial
Ctsa	1.38e-59	-1.034	0.224	0.417	3.08e-55	Endothelial
Fcer1g	2.11e-61	-1.03393	0.207	0.42	4.7e-57	Endothelial
Ccl3	2.19e-59	-1.03363	0.054	0.216	4.89e-55	Endothelial
Ctsl	5.61e-47	-1.02268	0.294	0.456	1.25e-42	Endothelial
Npc2	7e-58	-1.01415	0.387	0.554	1.56e-53	Endothelial
Cdkn1a	5.16e-77	1.00171	0.417	0.161	1.15e-72	Endothelial
Atp1a2	5.33e-61	1.07575	0.478	0.25	1.19e-56	Endothelial
Hba-a1	6.06e-13	1.14403	0.182	0.105	1.35e-08	Endothelial
Hba-a2	7.9e-14	1.18143	0.15	0.077	1.76e-09	Endothelial
Slc1a2	3.47e-48	1.23376	0.51	0.302	7.74e-44	Endothelial
Hbb-bs	2.43e-30	1.34929	0.287	0.143	5.43e-26	Endothelial

## Sheet: Microglia
Gene	p_val	avg_log2FC	pct.1	pct.2	p_val_adj	Cell-Type
Apoe	0	-3.80108	0.907	1	0	Microglial
Cst7	0	-3.78053	0.02	0.706	0	Microglial
Lpl	0	-2.27425	0.029	0.494	0	Microglial
Lyz2	0	-2.09148	0.401	0.861	0	Microglial
Fabp5	0	-1.80512	0.065	0.426	0	Microglial
Gpnmb	2.42e-240	-1.80108	0	0.184	5.39e-236	Microglial
Igf1	0	-1.77398	0.009	0.366	0	Microglial
Ifi27l2a	0	-1.765	0.065	0.489	0	Microglial
Ank	0	-1.64708	0.075	0.458	0	Microglial
Lgals3bp	0	-1.61093	0.185	0.63	0	Microglial
Csf1	0	-1.46489	0.072	0.396	0	Microglial
Rps28	0	-1.43342	0.761	0.946	0	Microglial
Cd74	1.37e-303	-1.41651	0.083	0.362	3.07e-299	Microglial
Hif1a	0	-1.35772	0.237	0.604	0	Microglial
Spp1	5.56e-147	-1.35731	0.004	0.127	1.24e-142	Microglial
Syngr1	0	-1.34245	0.489	0.787	0	Microglial
Itgax	0	-1.34029	0.021	0.294	0	Microglial
Cox6a2	0	-1.31305	0.029	0.32	0	Microglial
Rpl38	0	-1.30696	0.793	0.954	0	Microglial
Rpl41	0	-1.27925	0.863	0.968	0	Microglial
Lilrb4a	0	-1.25842	0.015	0.259	0	Microglial
Cd63	0	-1.25829	0.523	0.839	0	Microglial
Gnas	0	-1.24667	0.525	0.81	0	Microglial
Cd52	0	-1.24396	0.491	0.805	0	Microglial
Axl	0	-1.24019	0.019	0.314	0	Microglial
Ctsb	0	-1.23291	0.921	0.982	0	Microglial
Myo1e	0	-1.1849	0.051	0.347	0	Microglial
Rps21	0	-1.16736	0.901	0.976	0	Microglial
Rps29	0	-1.16143	0.976	0.995	0	Microglial
Baiap2l2	0	-1.13693	0.001	0.239	0	Microglial
Rpl35	0	-1.12809	0.503	0.803	0	Microglial
Aplp2	0	-1.12256	0.292	0.596	0	Microglial
Pld3	0	-1.11688	0.189	0.51	0	Microglial
Rpl39	0	-1.11127	0.768	0.933	0	Microglial
Rpl37a	0	-1.10083	0.874	0.968	0	Microglial
Ctsd	0	-1.09711	0.991	0.999	0	Microglial
Ccl6	7.9e-204	-1.08497	0.225	0.462	1.76e-199	Microglial
Rpl37	0	-1.06853	0.879	0.965	0	Microglial
H2-K1	0	-1.06012	0.38	0.72	0	Microglial
Tyrobp	0	-1.05265	0.946	0.983	0	Microglial
Cacna1a	1.28e-277	-1.04944	0.061	0.318	2.85e-273	Microglial
Rpl6	0	-1.03932	0.837	0.951	0	Microglial
Ifitm3	3.37e-234	-1.03074	0.078	0.314	7.51e-230	Microglial
Ctsz	0	-1.02497	0.909	0.975	0	Microglial
Nceh1	2.51e-288	-1.02444	0.065	0.331	5.6e-284	Microglial
Ctsl	0	-1.01585	0.703	0.881	0	Microglial
Rps27	0	-1.00991	0.806	0.943	0	Microglial
Trem2	0	-1.00756	0.94	0.984	0	Microglial
Crlf2	9.74e-283	-1.00353	0.177	0.469	2.17e-278	Microglial
Selplg	0	1.00683	0.891	0.721	0	Microglial
Jund	1.27e-211	1.00688	0.673	0.52	2.83e-207	Microglial
Ptgds	1.28e-286	1.03625	0.524	0.277	2.85e-282	Microglial
Ecscr	0	1.04745	0.39	0.138	0	Microglial
Pnp	1.95e-300	1.05804	0.404	0.164	4.36e-296	Microglial
Stab1	0	1.06279	0.405	0.139	0	Microglial
Hba-a1	2.74e-50	1.08076	0.136	0.068	6.11e-46	Microglial
Hba-a2	4.07e-31	1.10017	0.104	0.056	9.09e-27	Microglial
Hspa1a	8.85e-244	1.13034	0.129	0.011	1.98e-239	Microglial
Tmem119	0	1.14457	0.875	0.592	0	Microglial
P2ry12	0	1.15297	0.912	0.737	0	Microglial
Hbb-bs	1.59e-90	1.23725	0.226	0.114	3.55e-86	Microglial
Jun	0	1.31514	0.839	0.721	0	Microglial
Hspa1b	0	1.33178	0.166	0.012	0	Microglial
Rnase4	0	1.37789	0.74	0.431	0	Microglial
Crybb1	0	1.53118	0.512	0.152	0	Microglial

## Sheet: Neuron
Gene	p_val	avg_log2FC	pct.1	pct.2	p_val_adj	Cell-Type
Cst7	1.66e-216	-2.87856	0.006	0.428	3.7e-212	Neuron
Ctsd	5.13e-176	-1.9556	0.533	0.946	1.15e-171	Neuron
Lyz2	7.54e-122	-1.93347	0.148	0.52	1.68e-117	Neuron
Tyrobp	5.57e-150	-1.92468	0.331	0.789	1.24e-145	Neuron
Trem2	1.14e-118	-1.81795	0.304	0.702	2.54e-114	Neuron
Ctsb	4.2e-114	-1.81481	0.391	0.739	9.38e-110	Neuron
Rps28	5.24e-125	-1.79245	0.357	0.704	1.17e-120	Neuron
Ctsz	1.73e-102	-1.76516	0.313	0.657	3.87e-98	Neuron
Apoe	9.81e-193	-1.68026	0.965	1	2.19e-188	Neuron
Rps29	1.53e-181	-1.6599	0.652	0.929	3.43e-177	Neuron
Syngr1	4.17e-72	-1.63303	0.153	0.425	9.3e-68	Neuron
Cd52	1.54e-85	-1.61242	0.143	0.447	3.43e-81	Neuron
Lpl	4.38e-107	-1.56687	0.007	0.239	9.79e-103	Neuron
Gfap	7.4e-55	-1.54781	0.042	0.224	1.65e-50	Neuron
Ifi27l2a	1.66e-90	-1.50022	0.03	0.271	3.71e-86	Neuron
Fau	6.88e-118	-1.46279	0.526	0.822	1.54e-113	Neuron
B2m	1.36e-88	-1.46274	0.306	0.621	3.03e-84	Neuron
Rpl39	2.75e-88	-1.42307	0.374	0.669	6.13e-84	Neuron
Rpl38	2.37e-110	-1.41319	0.466	0.756	5.29e-106	Neuron
Rpl6	1.42e-109	-1.41074	0.444	0.747	3.16e-105	Neuron
Rps21	6.02e-121	-1.37932	0.54	0.814	1.34e-116	Neuron
Cd68	1.28e-57	-1.37249	0.154	0.395	2.86e-53	Neuron
Rpl37	2.57e-114	-1.36819	0.5	0.793	5.74e-110	Neuron
Ctsl	4.9e-59	-1.35901	0.253	0.514	1.09e-54	Neuron
Rpl37a	1.58e-103	-1.35844	0.497	0.772	3.53e-99	Neuron
Rpl41	9.85e-117	-1.35386	0.54	0.815	2.2e-112	Neuron
Rpl18a	1.57e-107	-1.34464	0.517	0.804	3.49e-103	Neuron
Timp2	7.84e-56	-1.33486	0.2	0.445	1.75e-51	Neuron
Rps12	2.91e-97	-1.30302	0.521	0.791	6.5e-93	Neuron
Npc2	2.12e-57	-1.29234	0.295	0.539	4.73e-53	Neuron
Lgals3bp	8.01e-63	-1.28508	0.088	0.319	1.79e-58	Neuron
H2-D1	2.11e-65	-1.26788	0.185	0.455	4.72e-61	Neuron
Rps27	1.28e-81	-1.25625	0.44	0.698	2.85e-77	Neuron
Rpl35	3.31e-60	-1.23585	0.244	0.506	7.39e-56	Neuron
Rpl12	7.05e-64	-1.21169	0.375	0.633	1.57e-59	Neuron
Rpl10a	5.15e-64	-1.21007	0.309	0.584	1.15e-59	Neuron
Rpl23	5.46e-79	-1.20425	0.458	0.727	1.22e-74	Neuron
Eef1a1	4.1e-76	-1.20116	0.504	0.734	9.14e-72	Neuron
Rps4x	1.05e-66	-1.1892	0.359	0.632	2.35e-62	Neuron
Hexa	7.57e-45	-1.1726	0.219	0.44	1.69e-40	Neuron
Rpl19	2.6e-66	-1.1711	0.399	0.657	5.81e-62	Neuron
Mpeg1	3.8e-45	-1.15453	0.197	0.425	8.48e-41	Neuron
Ftl1	4.3e-68	-1.13938	0.429	0.702	9.61e-64	Neuron
Ctss	5.05e-73	-1.1376	0.381	0.726	1.13e-68	Neuron
H2-K1	2.71e-50	-1.13077	0.189	0.429	6.06e-46	Neuron
Grn	4.57e-43	-1.12403	0.249	0.473	1.02e-38	Neuron
Rps5	6.87e-61	-1.12147	0.372	0.631	1.53e-56	Neuron
Rack1	6.89e-55	-1.12071	0.295	0.546	1.54e-50	Neuron
Rpl21	1.9e-60	-1.11706	0.479	0.684	4.25e-56	Neuron
Rpl36	3.62e-62	-1.11207	0.418	0.665	8.08e-58	Neuron
Cyba	2.56e-45	-1.10544	0.264	0.497	5.71e-41	Neuron
Rpl32	1.75e-59	-1.10178	0.387	0.633	3.91e-55	Neuron
Ctsa	7.08e-39	-1.09473	0.239	0.445	1.58e-34	Neuron
Rplp2	4.12e-67	-1.08952	0.456	0.702	9.19e-63	Neuron
Rps24	1.13e-67	-1.08121	0.456	0.709	2.52e-63	Neuron
Ccl4	6.08e-47	-1.07922	0.052	0.227	1.36e-42	Neuron
Ccl6	2.98e-34	-1.07201	0.064	0.211	6.64e-30	Neuron
Rps14	1.14e-72	-1.0613	0.502	0.744	2.55e-68	Neuron
Rps9	2.36e-61	-1.05644	0.455	0.691	5.27e-57	Neuron
Igf1	5.58e-76	-1.05566	0.008	0.182	1.24e-71	Neuron
Cd9	2.25e-37	-1.03916	0.171	0.369	5.03e-33	Neuron
Rplp0	1.5e-44	-1.03854	0.321	0.536	3.36e-40	Neuron
Rpl35a	1.31e-61	-1.03362	0.441	0.687	2.92e-57	Neuron
Rpl30	9.46e-60	-1.02746	0.42	0.669	2.11e-55	Neuron
Rpl10	9.74e-44	-1.01156	0.367	0.58	2.17e-39	Neuron
Csf1	4e-40	-1.00557	0.054	0.211	8.94e-36	Neuron
Acsl3	1.62e-30	1.00279	0.51	0.312	3.62e-26	Neuron
Cspg5	2.82e-28	1.00887	0.423	0.229	6.29e-24	Neuron
Vegfa	1.35e-21	1.01064	0.278	0.126	3.01e-17	Neuron
Mt3	3.88e-15	1.08012	0.525	0.408	8.66e-11	Neuron
Slc1a2	3.75e-71	1.09894	0.913	0.774	8.37e-67	Neuron
Htra1	8.61e-34	1.13127	0.338	0.132	1.92e-29	Neuron
Ptgds	1.69e-50	1.15313	0.539	0.268	3.76e-46	Neuron
Aldoc	2.41e-23	1.22951	0.437	0.271	5.38e-19	Neuron

## Sheet: Oligodendrocyte
Gene	p_val	avg_log2FC	pct.1	pct.2	p_val_adj	Cell-Type
Cst7	0	-2.22333	0.005	0.395	0	Oligodendrocyte
Tyrobp	0	-2.08505	0.276	0.769	0	Oligodendrocyte
Ctsd	0	-2.02355	0.691	0.97	0	Oligodendrocyte
Trem2	0	-2.0021	0.252	0.706	0	Oligodendrocyte
C4b	6.57e-302	-1.96681	0.108	0.365	1.47e-297	Oligodendrocyte
Ctsz	0	-1.63166	0.38	0.683	0	Oligodendrocyte
Apoe	0	-1.62679	0.974	0.999	0	Oligodendrocyte
Lyz2	0	-1.59029	0.121	0.477	0	Oligodendrocyte
Ctsb	0	-1.46765	0.594	0.804	0	Oligodendrocyte
Ctss	0	-1.44393	0.347	0.697	0	Oligodendrocyte
Cd52	0	-1.42663	0.109	0.419	0	Oligodendrocyte
B2m	0	-1.40038	0.279	0.583	0	Oligodendrocyte
Syngr1	0	-1.36857	0.125	0.405	0	Oligodendrocyte
C1qa	0	-1.2829	0.47	0.818	0	Oligodendrocyte
Cd68	1.62e-285	-1.24684	0.105	0.362	3.61e-281	Oligodendrocyte
Rps29	0	-1.20713	0.907	0.983	0	Oligodendrocyte
C1qb	0	-1.17376	0.41	0.754	0	Oligodendrocyte
Rps28	0	-1.11316	0.677	0.857	0	Oligodendrocyte
Mpeg1	1.16e-198	-1.07748	0.134	0.352	2.59e-194	Oligodendrocyte
Lpl	0	-1.0762	0.009	0.207	0	Oligodendrocyte
Grn	2.16e-217	-1.07525	0.233	0.478	4.83e-213	Oligodendrocyte
Ctsl	2.72e-189	-1.06887	0.365	0.566	6.06e-185	Oligodendrocyte
Cyba	1.66e-217	-1.03827	0.2	0.445	3.7e-213	Oligodendrocyte
C1qc	6.57e-257	-1.0282	0.286	0.582	1.47e-252	Oligodendrocyte
Fcer1g	1.76e-220	-1.02391	0.208	0.467	3.92e-216	Oligodendrocyte
Slc1a2	2.47e-149	1.07728	0.529	0.308	5.5e-145	Oligodendrocyte

## Sheet: OPC
Gene	p_val	avg_log2FC	pct.1	pct.2	p_val_adj	Cell-Type
Cst7	3.28e-229	-2.71771	0.005	0.457	7.33e-225	OPC
Ctsd	1.51e-297	-2.66737	0.616	0.962	3.37e-293	OPC
Tyrobp	4.67e-239	-2.55704	0.271	0.793	1.04e-234	OPC
Trem2	1.21e-215	-2.32781	0.253	0.744	2.69e-211	OPC
Ctsz	2.27e-136	-2.05349	0.358	0.683	5.07e-132	OPC
Cd52	6.61e-144	-1.97277	0.111	0.492	1.48e-139	OPC
Lyz2	9.89e-157	-1.91169	0.111	0.51	2.21e-152	OPC
Ctsb	9.05e-137	-1.83792	0.551	0.789	2.02e-132	OPC
Ctss	3.73e-145	-1.76192	0.358	0.745	8.32e-141	OPC
C1qa	8.41e-156	-1.62383	0.484	0.832	1.88e-151	OPC
Grn	4.27e-84	-1.55981	0.228	0.505	9.54e-80	OPC
C1qb	1.06e-143	-1.557	0.428	0.794	2.37e-139	OPC
Cd68	9.41e-100	-1.54377	0.109	0.41	2.1e-95	OPC
B2m	2.26e-93	-1.51381	0.379	0.633	5.05e-89	OPC
Mpeg1	1.26e-89	-1.472	0.131	0.419	2.81e-85	OPC
Rps29	1.49e-211	-1.40047	0.874	0.971	3.33e-207	OPC
Rps28	2.34e-123	-1.36818	0.607	0.799	5.22e-119	OPC
Fcer1g	4.6e-87	-1.36517	0.212	0.521	1.03e-82	OPC
Syngr1	1.03e-72	-1.36271	0.295	0.537	2.3e-68	OPC
Lpl	5.79e-104	-1.36148	0.011	0.25	1.29e-99	OPC
Laptm5	1.24e-92	-1.35873	0.246	0.568	2.77e-88	OPC
C1qc	3.75e-95	-1.3389	0.291	0.622	8.36e-91	OPC
Ly6e	4.3e-79	-1.301	0.243	0.53	9.59e-75	OPC
Ifi27l2a	1.92e-44	-1.2852	0.236	0.441	4.29e-40	OPC
Hexa	2.05e-62	-1.27459	0.242	0.475	4.58e-58	OPC
Ccl6	4.47e-72	-1.27171	0.041	0.249	9.98e-68	OPC
Hexb	5.41e-78	-1.1984	0.361	0.632	1.21e-73	OPC
Cyba	2.45e-66	-1.16865	0.272	0.515	5.48e-62	OPC
Ctsa	2.04e-61	-1.16375	0.22	0.452	4.56e-57	OPC
Timp2	2.81e-57	-1.15273	0.275	0.488	6.27e-53	OPC
Lgals3bp	7.23e-73	-1.11767	0.108	0.354	1.61e-68	OPC
Fau	2.21e-107	-1.10949	0.781	0.874	4.94e-103	OPC
Rpl39	3.77e-89	-1.09711	0.615	0.779	8.42e-85	OPC
Itgb5	1.8e-57	-1.06418	0.156	0.386	4.01e-53	OPC
Aif1	1.99e-67	-1.06352	0.146	0.402	4.44e-63	OPC
Rpl18a	4.17e-101	-1.03323	0.751	0.875	9.3e-97	OPC
Gpnmb	2.62e-44	-1.02799	0.006	0.115	5.86e-40	OPC
Irf8	3.65e-62	-1.02544	0.124	0.361	8.14e-58	OPC
Ccl3	2.49e-64	-1.01893	0.051	0.254	5.55e-60	OPC
Rpl12	6.7e-68	-1.01682	0.556	0.719	1.5e-63	OPC
Ctsl	7.34e-39	-1.01591	0.388	0.54	1.64e-34	OPC
Ly86	1.01e-52	-1.0125	0.137	0.353	2.24e-48	OPC
Tmsb4x	8.07e-81	-1.00887	0.816	0.923	1.8e-76	OPC
Rpl37a	5.09e-106	-1.00409	0.75	0.875	1.14e-101	OPC
Mal	8.9e-39	1.04375	0.436	0.228	1.99e-34	OPC
Cryab	6.98e-64	1.0951	0.517	0.245	1.56e-59	OPC
