# Supplementary material for: Single-Cell RNA-seq reveals transcriptomic modulation of Alzheimer’s disease by activated protein C
Source: publisher site journal article supplement (doi:10.18632/aging.205624), 2024-02-21
Supplement: Supplementary file [file aging-v16i4-205624-supplementary-material-SD1.pdf]

**SUPPLEMENTARY FIGURES**

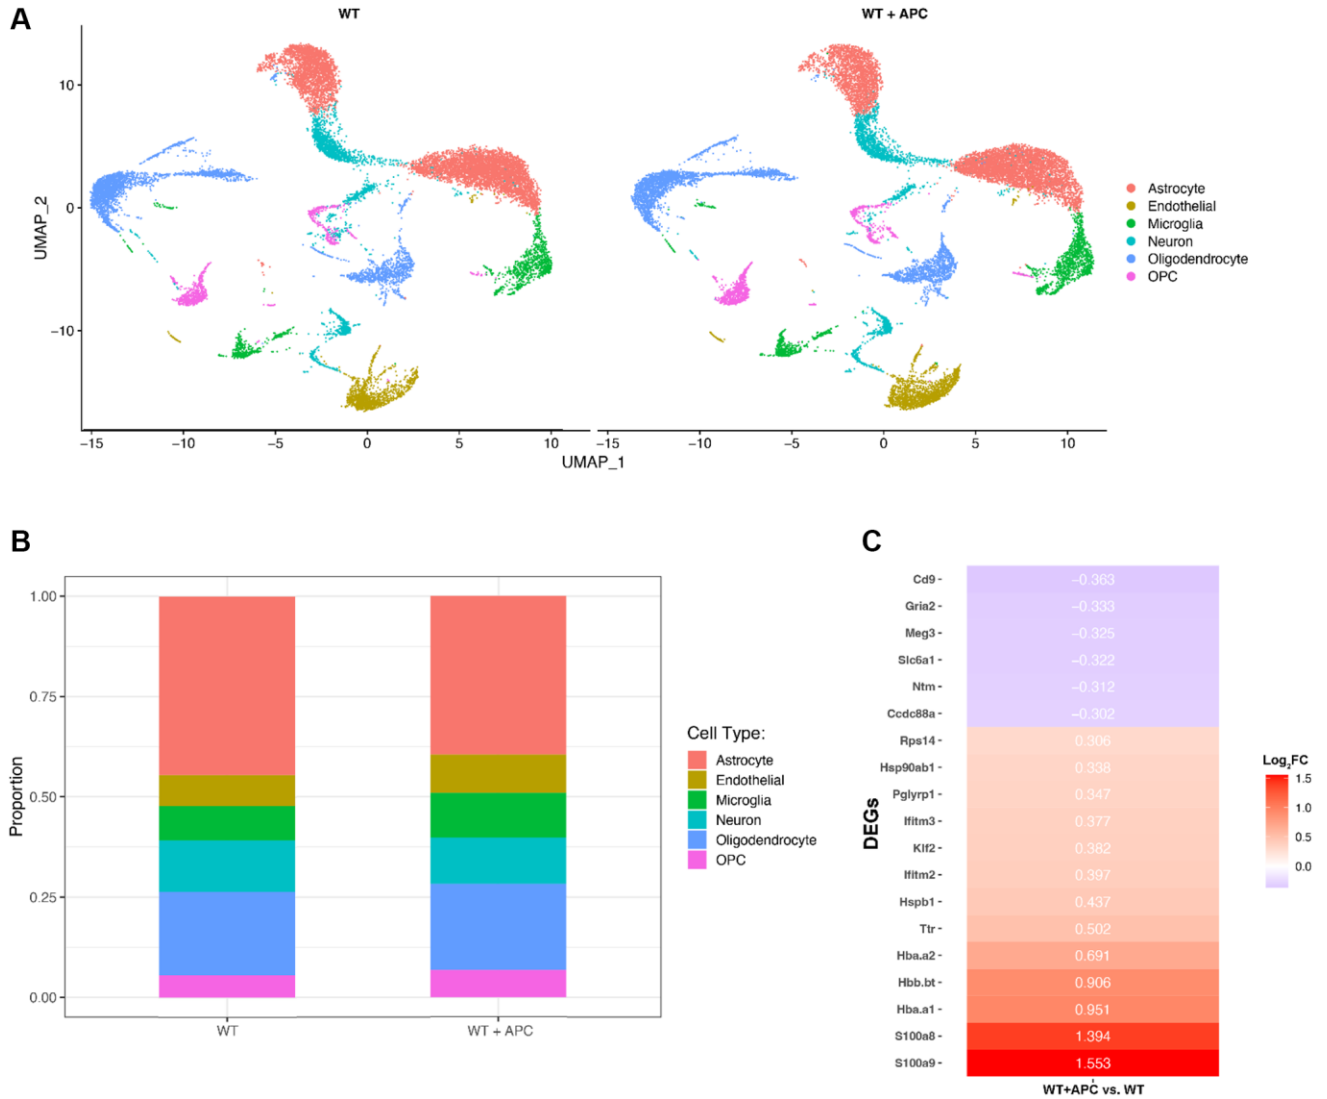

**Supplementary Figure 1.** (A) UMAP dimensional plot of control dataset: WT + APC versus WT. (B) Proportion of each cell-type observed in each sample of the control dataset. (C) Heatmap of all DEGs globally in the control dataset ( $p$ -value < 0.05).

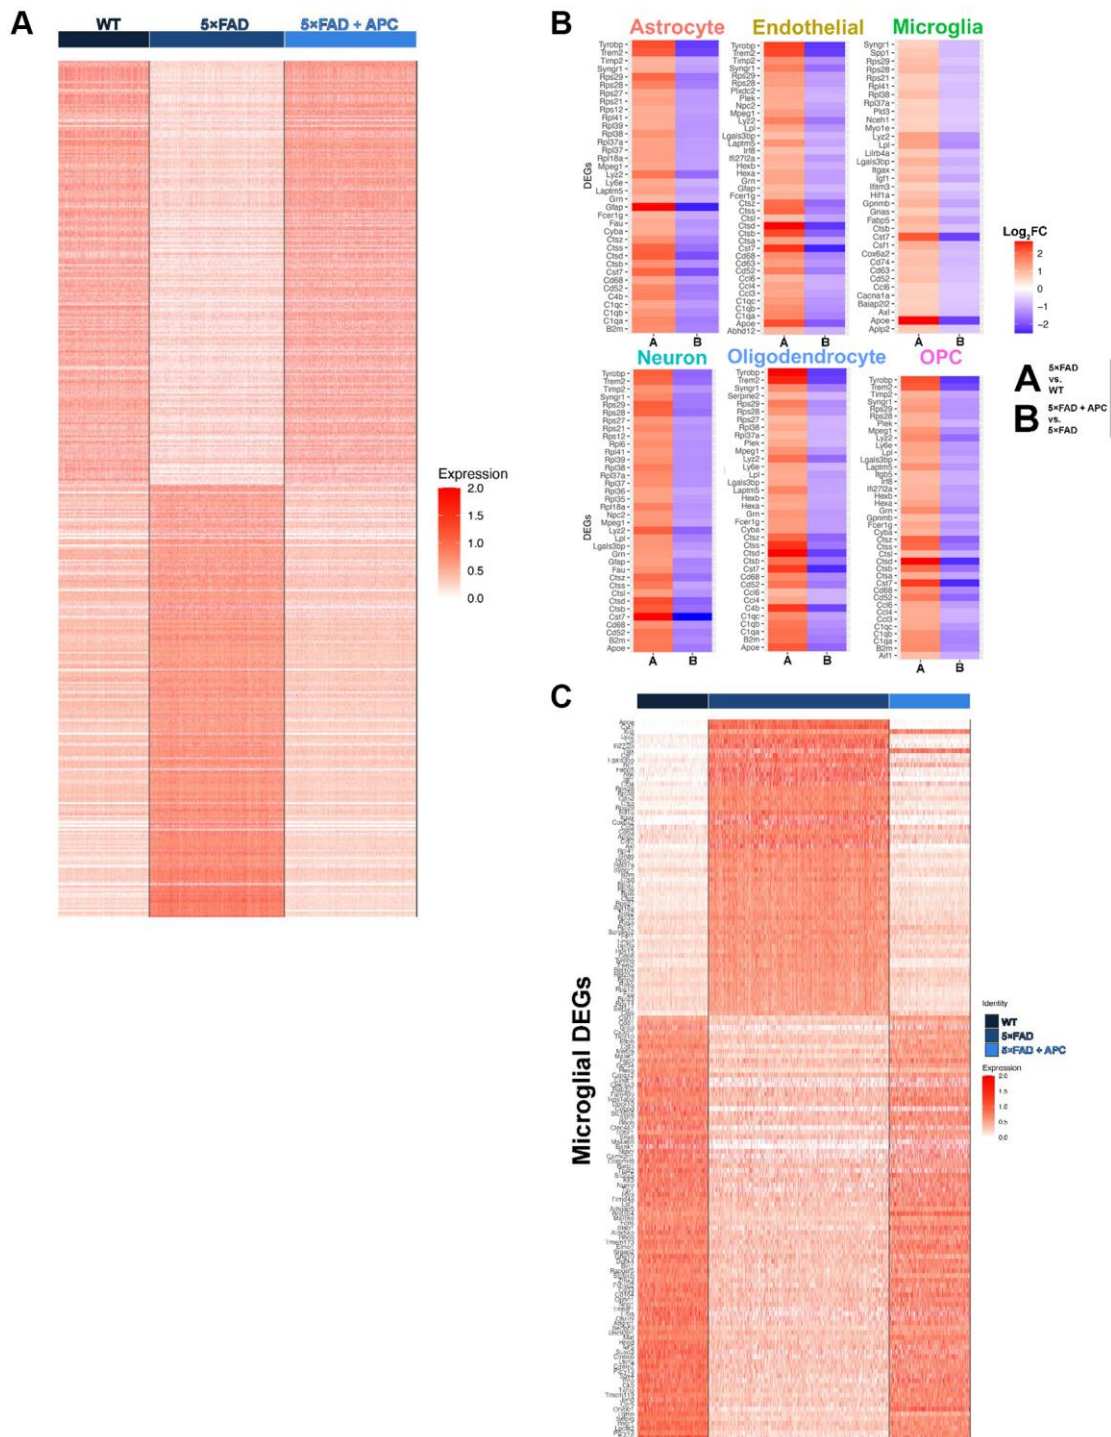

**Supplementary Figure 2.** (A) Global heatmap of all DEGs in the primary dataset (~500 DEGs) ( $p$ -value < 0.05). (B) Heatmap of top ~30 DEGs found in every cell-type in the primary integrated dataset. (C) Heatmap of all DEGs found within the microglial subset ( $p$ -value < 0.05).

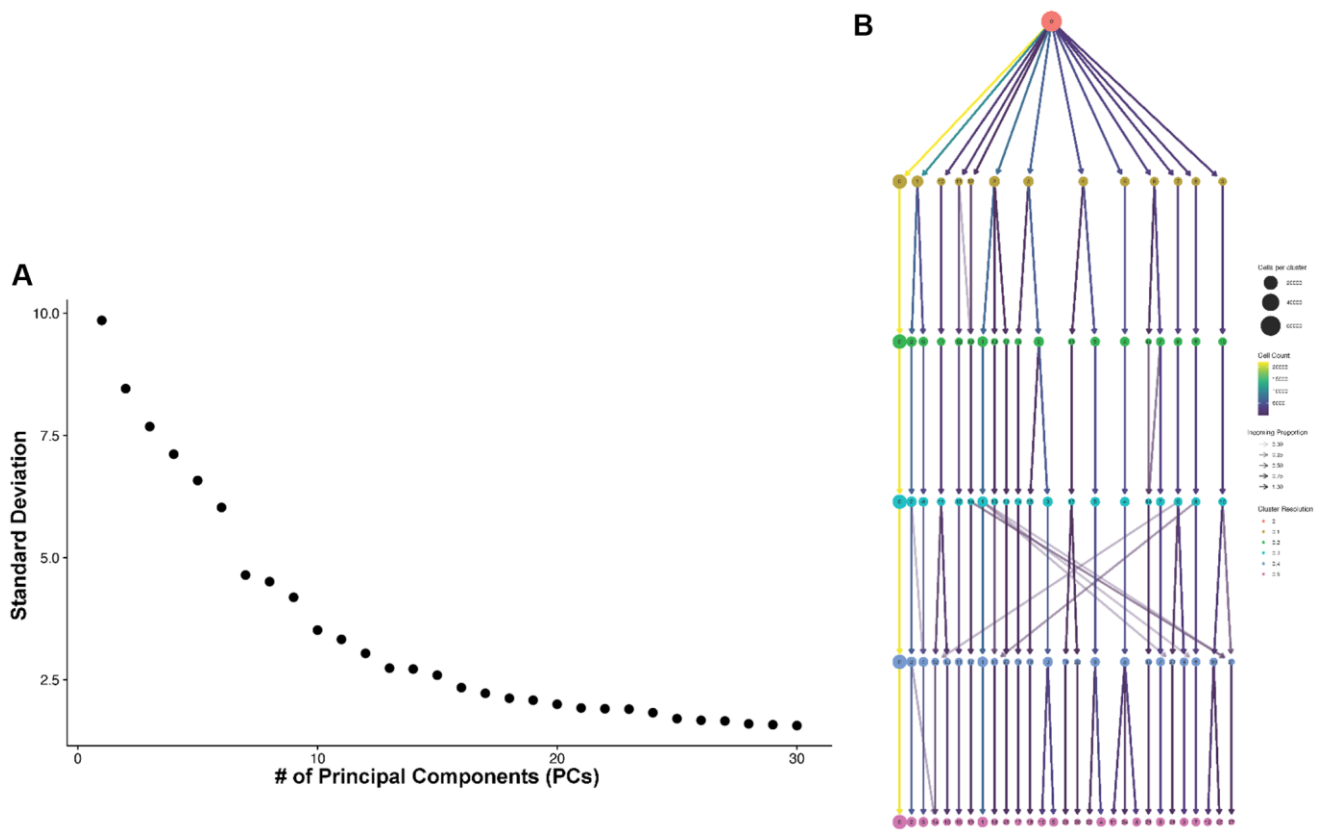

**Supplementary Figure 3.** (A) Elbow plot of variance per PC in the primary integrated dataset. (B) Cluster Tree of unsupervised clustering performed by Seurat.
