# Supplementary material for: Single-Cell RNA-seq reveals transcriptomic modulation of Alzheimer’s disease by activated protein C
Source: publisher site journal article supplement (doi:10.18632/aging.205624), 2024-02-21
Supplement: Supplementary file [file aging-v16i4-205624-supplementary-material-SD2.pdf]

```
conserved.marker.6 <- FindConservedMarkers(treatment.integrated_scale, only.pos=TRUE, grouping.var =  
"treatment", logfc.threshold=1,  
                                ident.1="6")  
conserved.marker.7 <- FindConservedMarkers(treatment.integrated_scale, only.pos=TRUE, grouping.var =  
"treatment", logfc.threshold=1,  
                                ident.1="7")  
conserved.marker.8 <- FindConservedMarkers(treatment.integrated_scale, only.pos=TRUE, grouping.var =  
"treatment", logfc.threshold=1,  
                                ident.1="8")  
conserved.marker.9 <- FindConservedMarkers(treatment.integrated_scale, only.pos=TRUE, grouping.var =  
"treatment", logfc.threshold=1,  
                                ident.1="9")  
conserved.marker.10 <- FindConservedMarkers(treatment.integrated_scale, only.pos=TRUE, grouping.var =  
"treatment", logfc.threshold=1,  
                                ident.1="10")  
conserved.marker.11 <- FindConservedMarkers(treatment.integrated_scale, only.pos=TRUE, grouping.var =  
"treatment", logfc.threshold=1,  
                                ident.1="11")  
conserved.marker.12 <- FindConservedMarkers(treatment.integrated_scale, only.pos=TRUE, grouping.var =  
"treatment", logfc.threshold=1,  
                                ident.1="12")  
conserved.marker.13 <- FindConservedMarkers(treatment.integrated_scale, only.pos=TRUE, grouping.var =  
"treatment", logfc.threshold=1,  
                                ident.1="13")  
conserved.marker.14 <- FindConservedMarkers(treatment.integrated_scale, only.pos=TRUE, grouping.var =  
"treatment", logfc.threshold=1,  
                                ident.1="14")  
conserved.marker.15 <- FindConservedMarkers(treatment.integrated_scale, only.pos=TRUE, grouping.var =  
"treatment", logfc.threshold=1,  
                                ident.1="15")  
conserved.marker.16 <- FindConservedMarkers(treatment.integrated_scale, only.pos=TRUE, grouping.var =  
"treatment", logfc.threshold=1,  
                                ident.1="16")  
conserved.marker.17 <- FindConservedMarkers(treatment.integrated_scale, only.pos=TRUE, grouping.var =  
"treatment", logfc.threshold=1,  
                                ident.1="17")  
conserved.marker.18 <- FindConservedMarkers(treatment.integrated_scale, only.pos=TRUE, grouping.var =  
"treatment", logfc.threshold=1,  
                                ident.1="18")
```

```
conserved.marker.19 <- FindConservedMarkers(treatment.integrated_scale, only.pos=TRUE, grouping.var =
"treatment", logfc.threshold=1,
                                ident.1="19")
#Form new Seurat object with clusters expressing strong conserved markers
ywt_fad_apc <- subset(treatment.integrated_scale, idents = c(0,1,2,3,5,6,7,8,10,11,13,14,15,16,17,18,19))
#Annotate Cell-types in order of subset idents
new.cluster.ids <- c("Microglia","Oligodendrocyte","Astrocyte","Endothelial","Oligodendrocyte","Neuron",
"OPC","Oligodendrocyte","Oligodendrocyte","OPC","Oligodendrocyte","Neuron","Endothelial",
"Oligodendrocyte","Oligodendrocyte","OPC","Oligodendrocyte")
names(new.cluster.ids) <- levels(ywt_fad_apc)
ywt_fad_apc <- RenameIdents(ywt_fad_apc, new.cluster.ids)
#Place Cell-types in alphabetical order
levels(ywt_fad_apc) <- c("Astrocyte","Endothelial", "Microglia", "Neuron", "Oligodendrocyte", "OPC")
```
